# Supplementary figures and images for: Immunoactivity of a hybrid membrane biosurface on nanoparticles: enhancing interactions with dendritic cells to augment anti-tumor immune responses
Source: Royal Society of Chemistry journal article supplement (doi:10.1039/d3bm01628e), 2023-12-29

**DAPI**

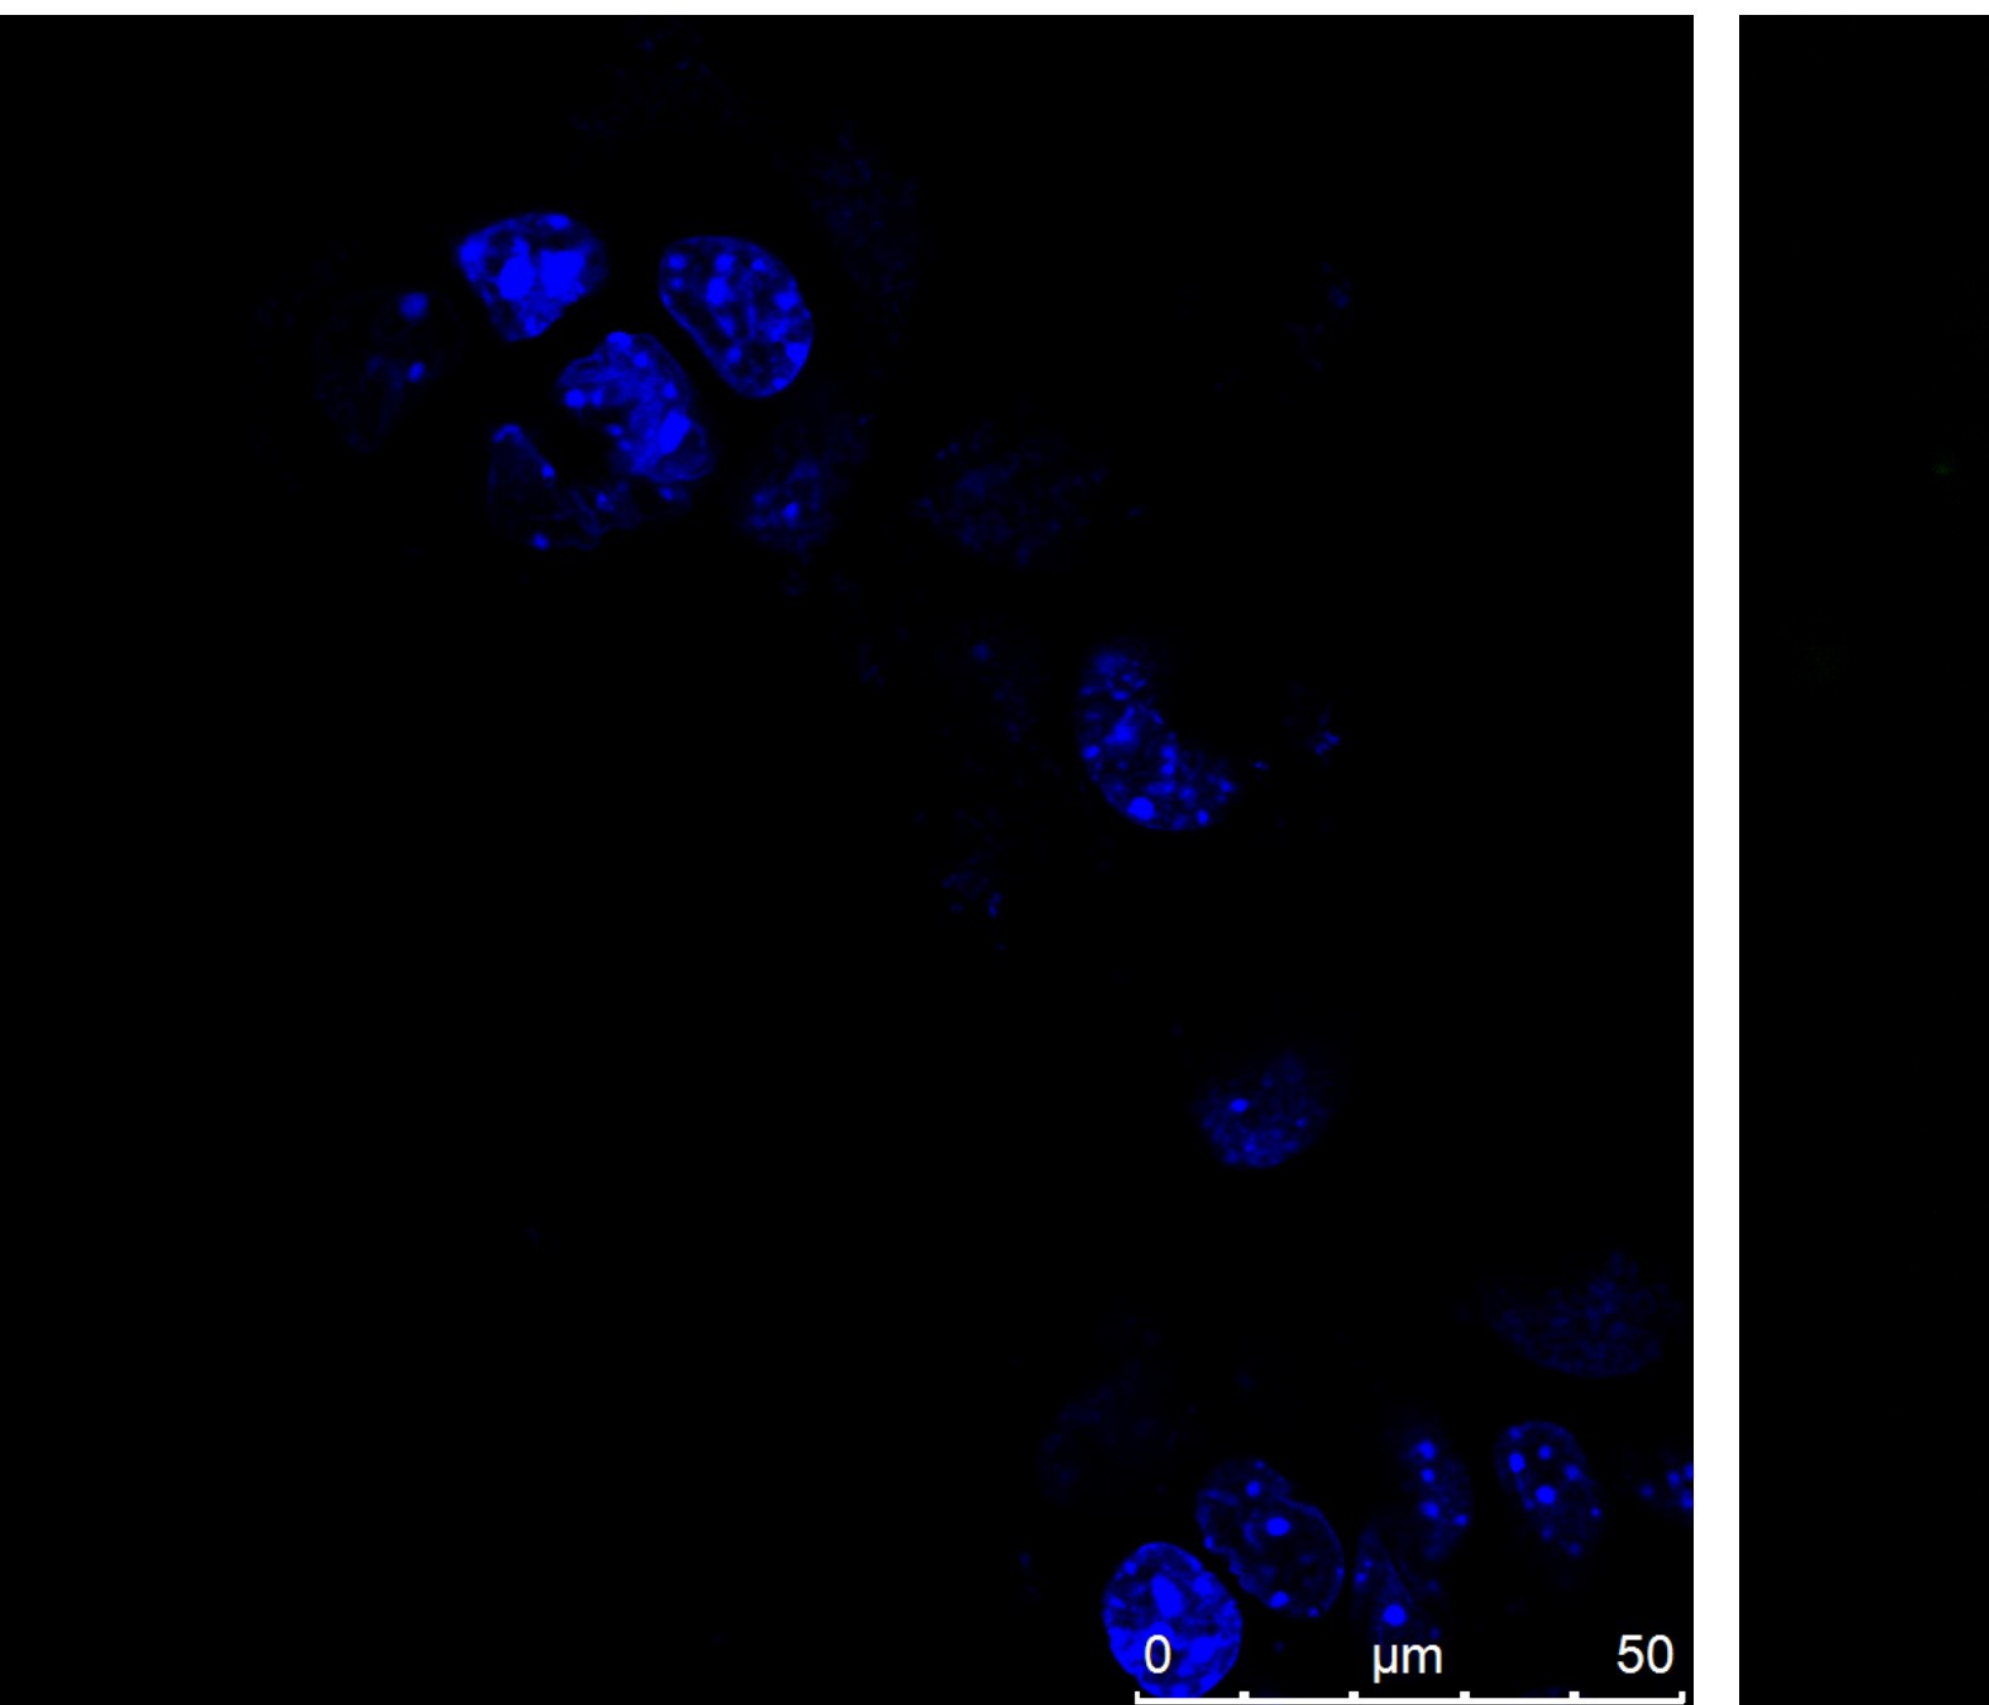

**DIO-4T1**

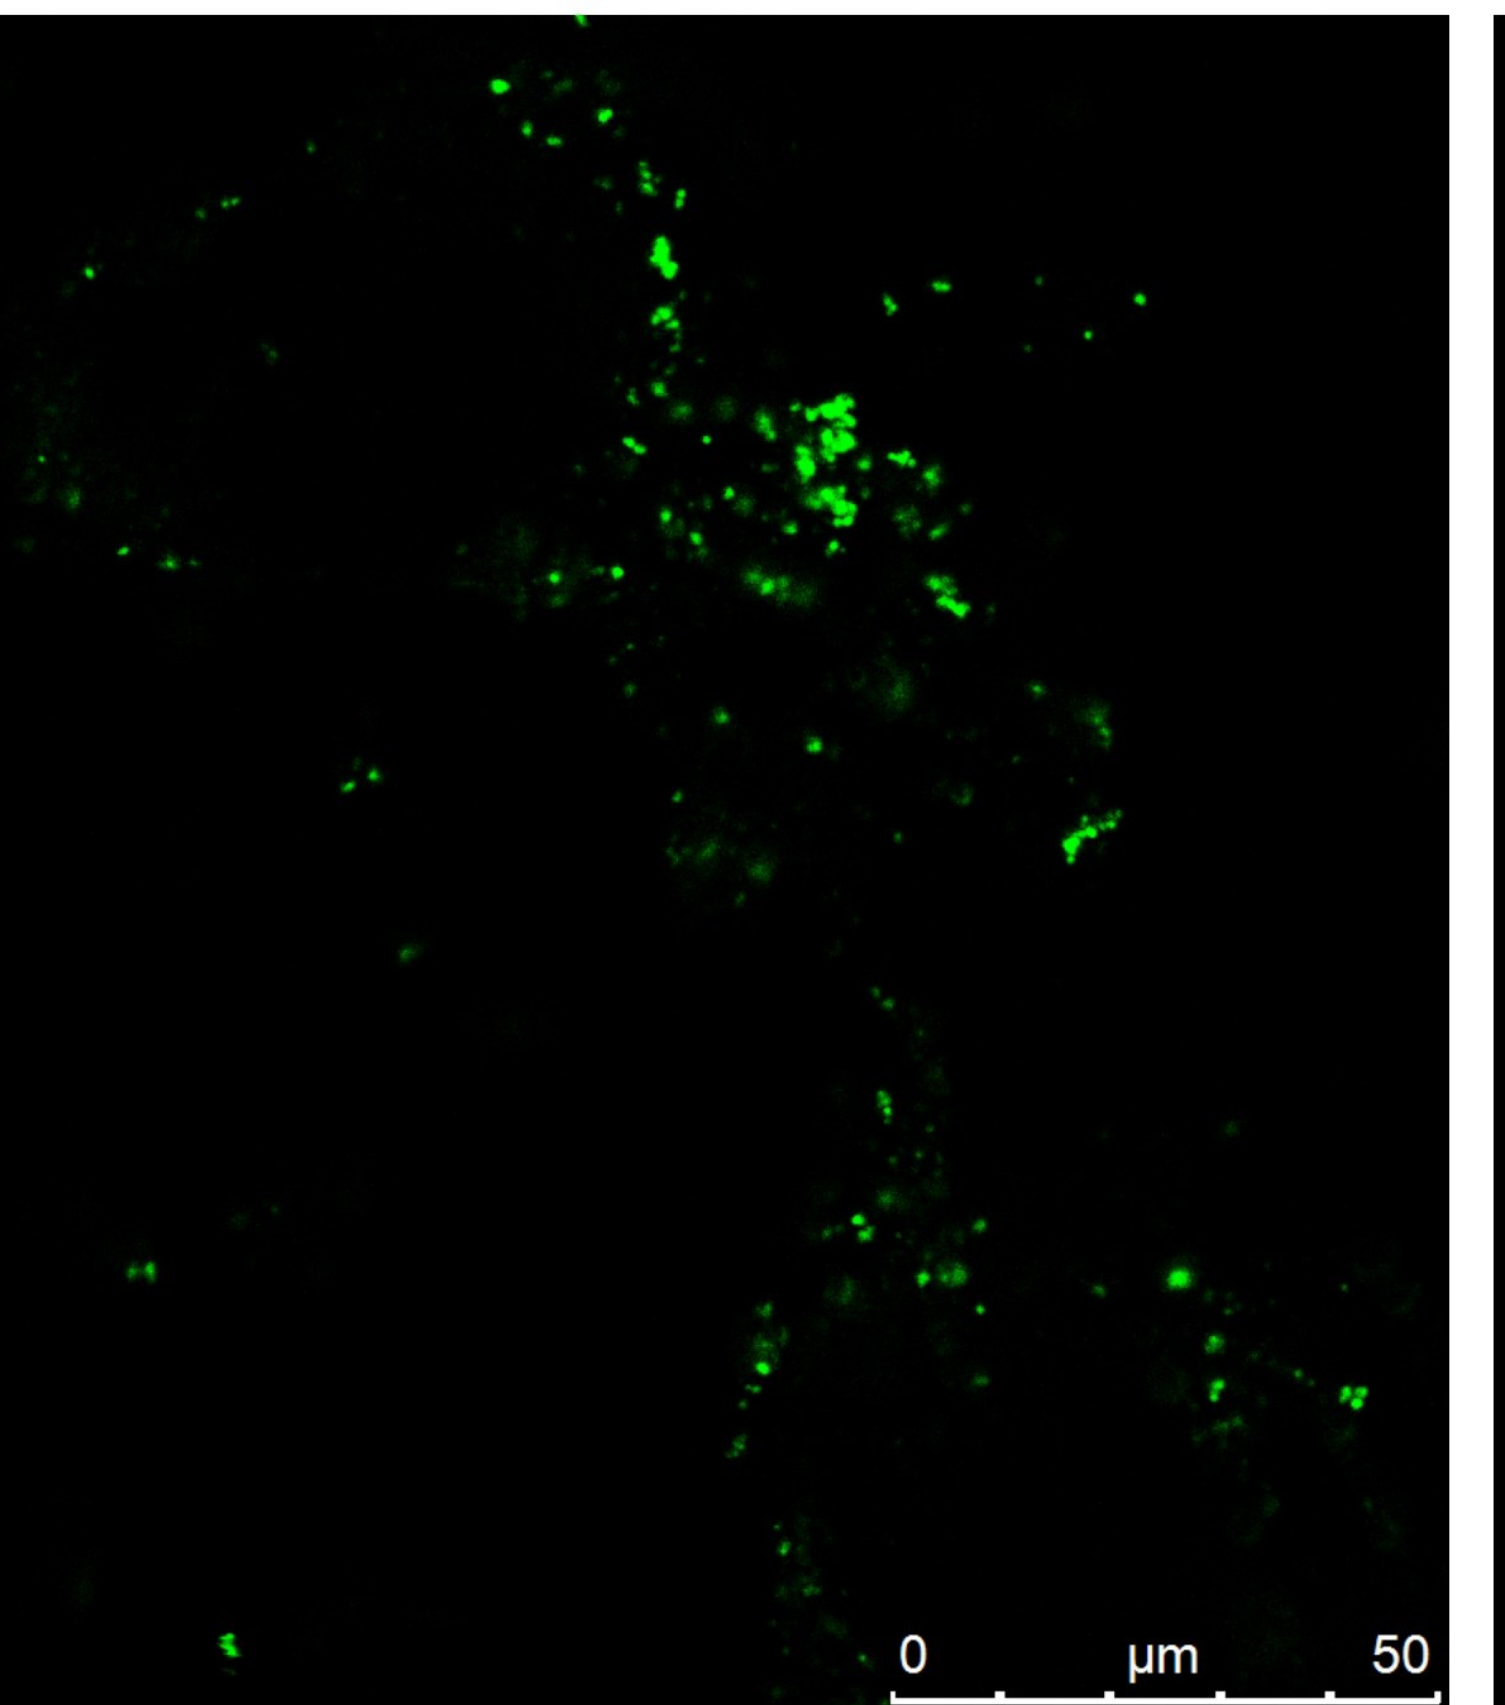

**DID-LI**

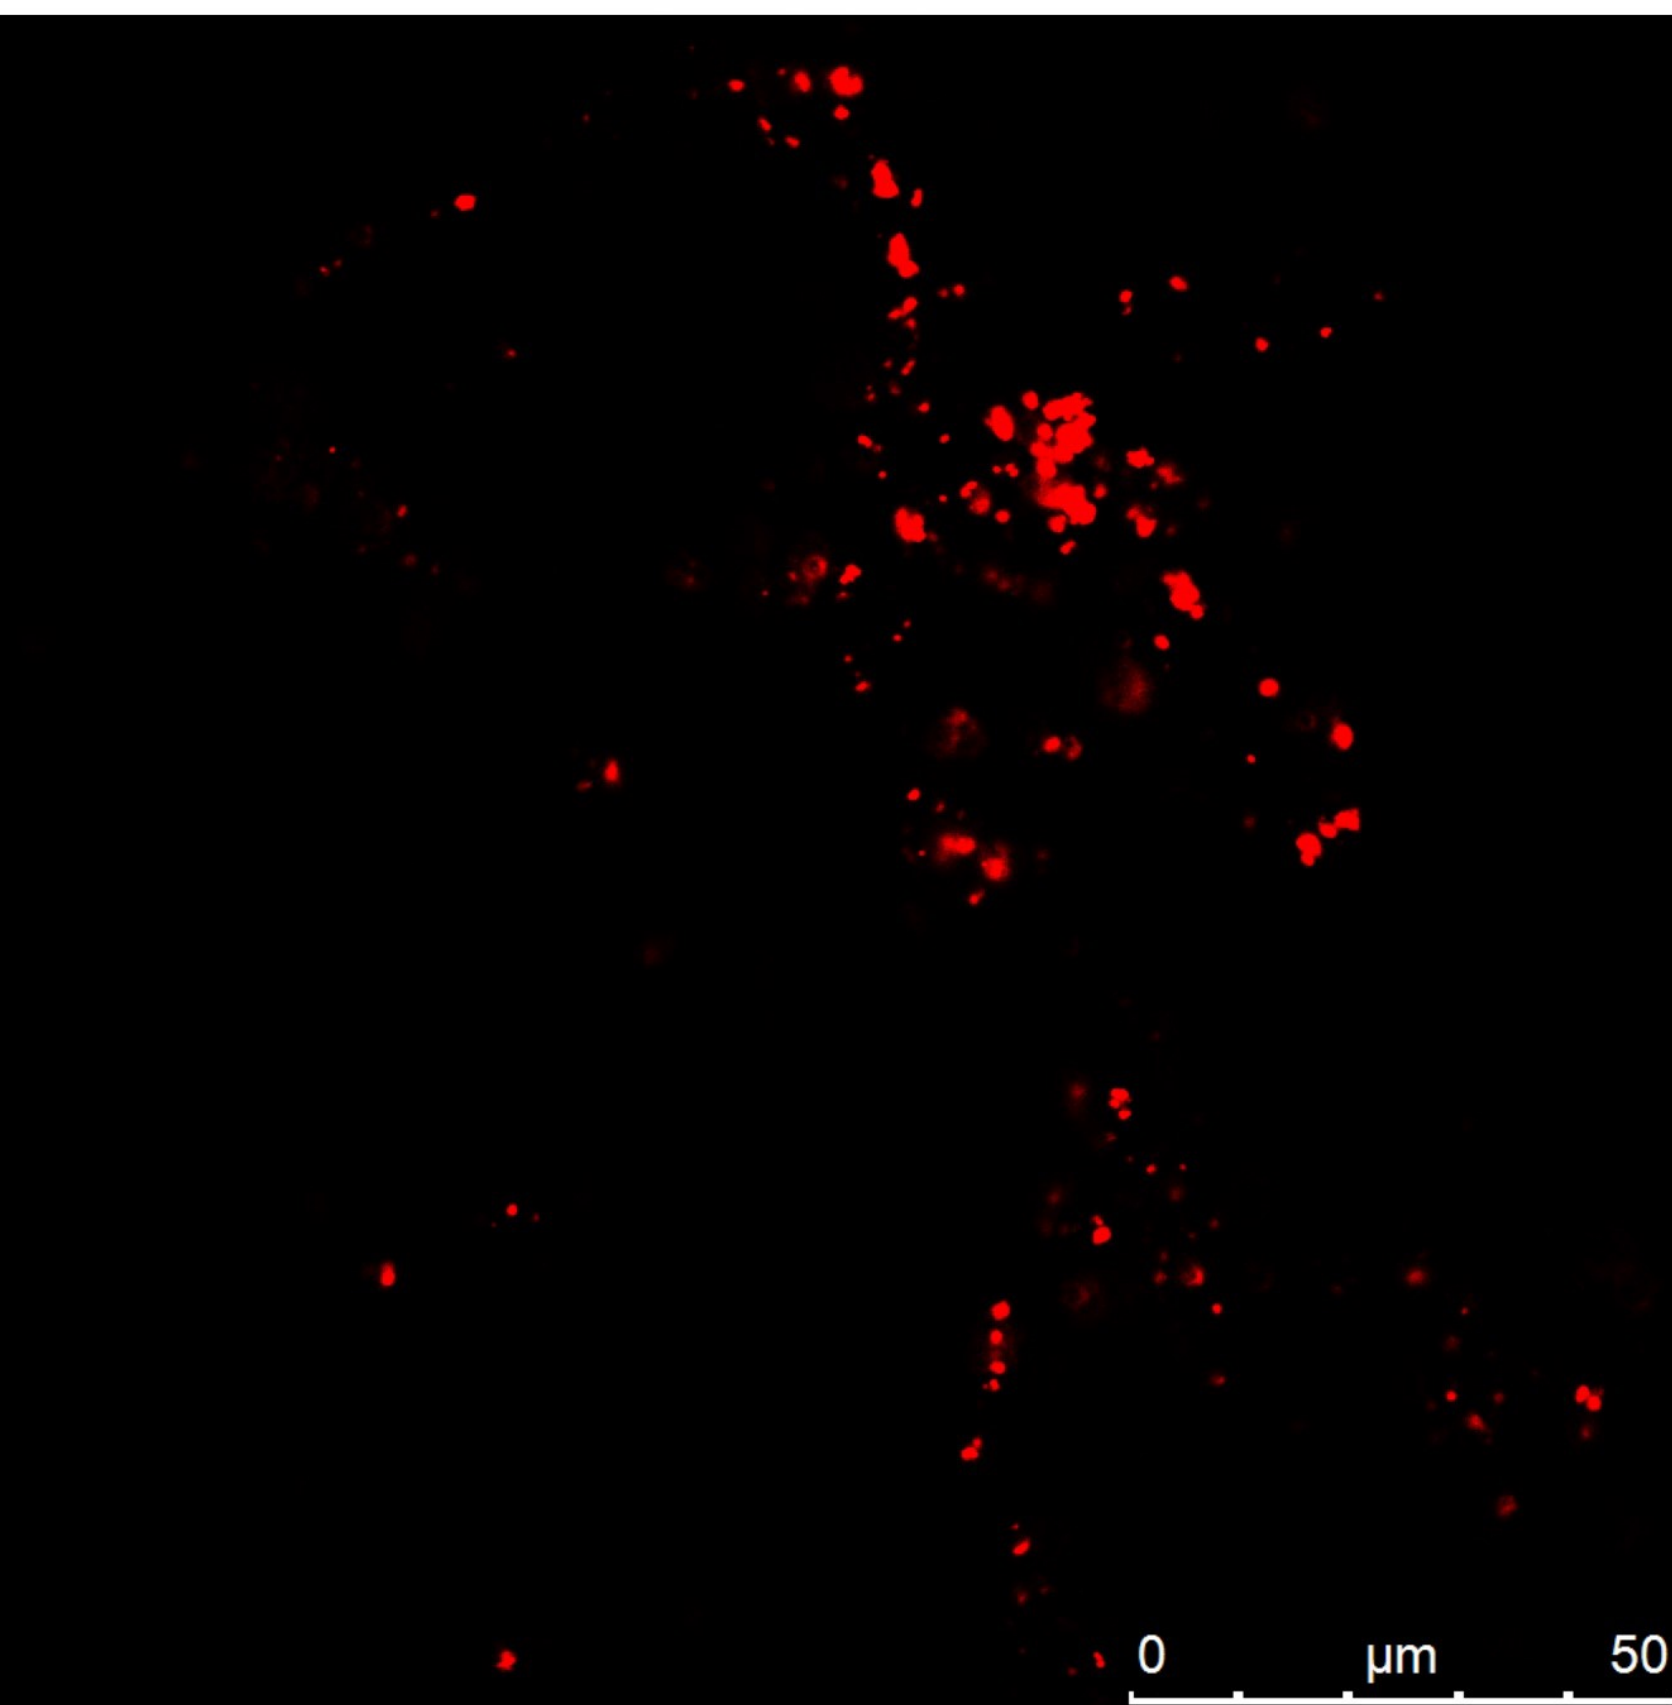

**Merge**

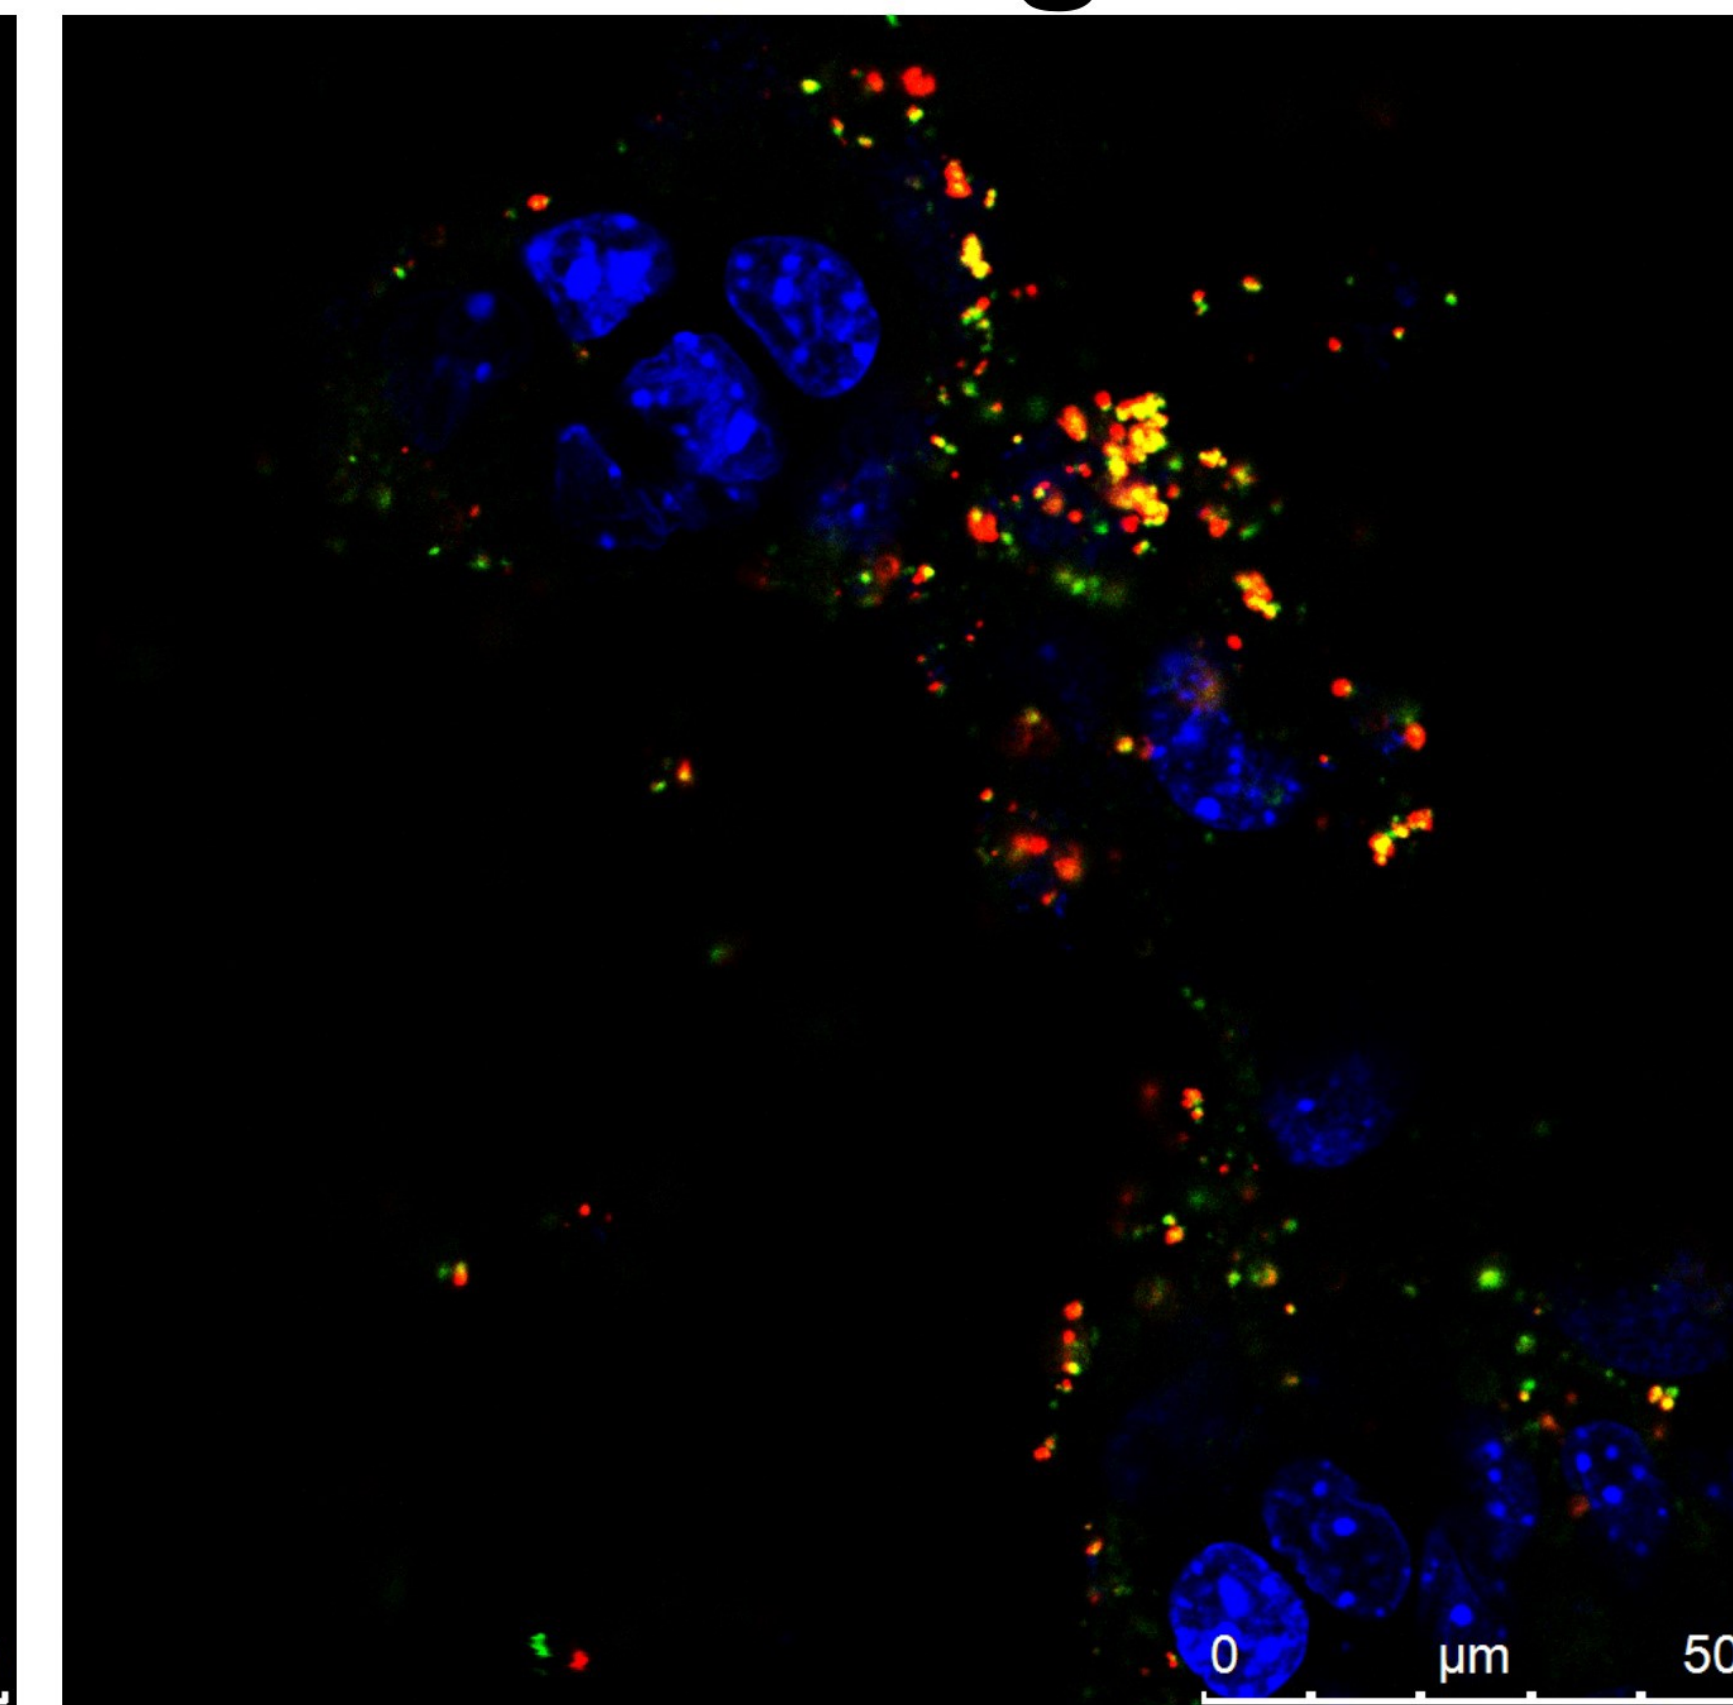

Supplement: d3bm01628e2.pdf [file d3bm01628e2.pdf]

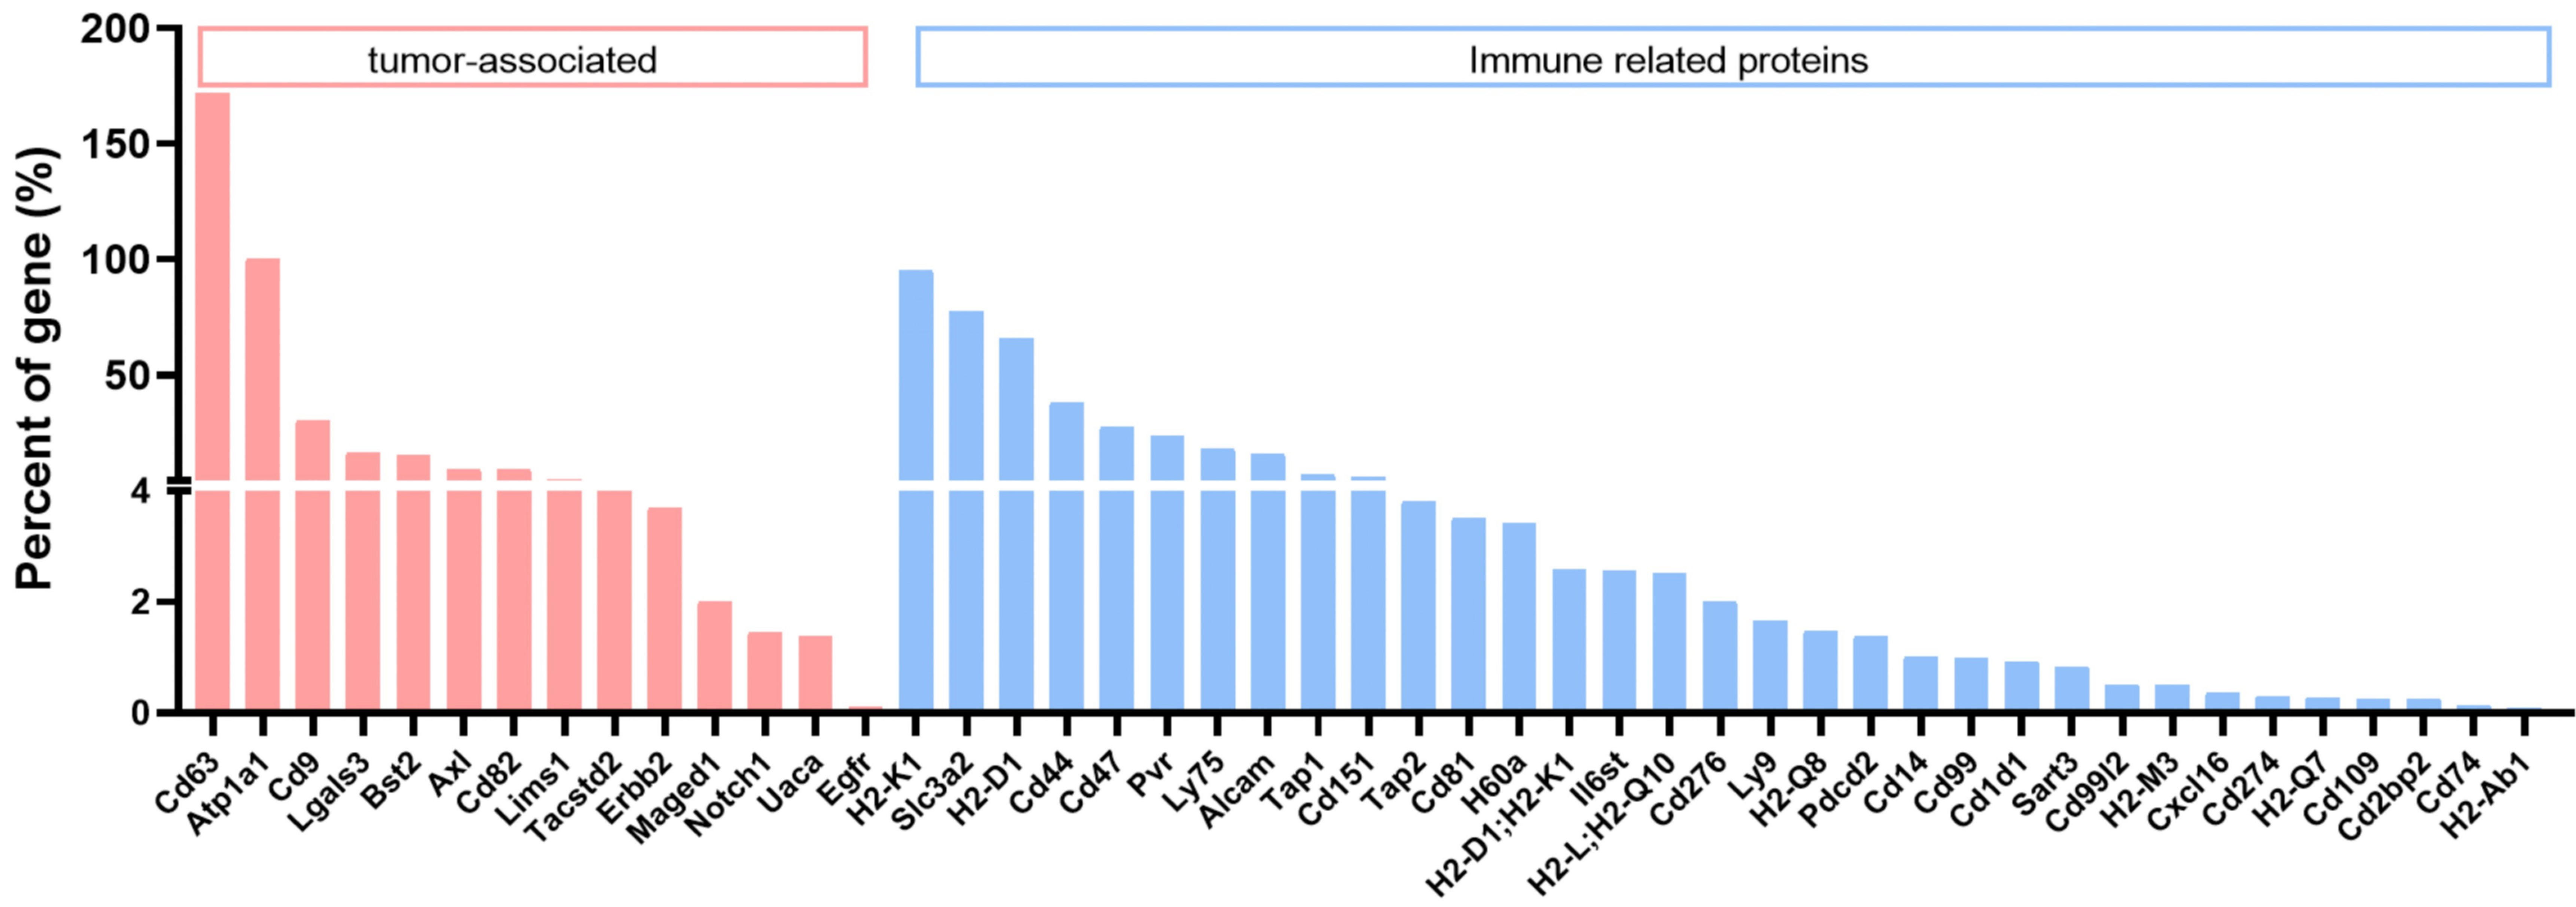

Supplement: d3bm01628e3.pdf [file d3bm01628e3.pdf]

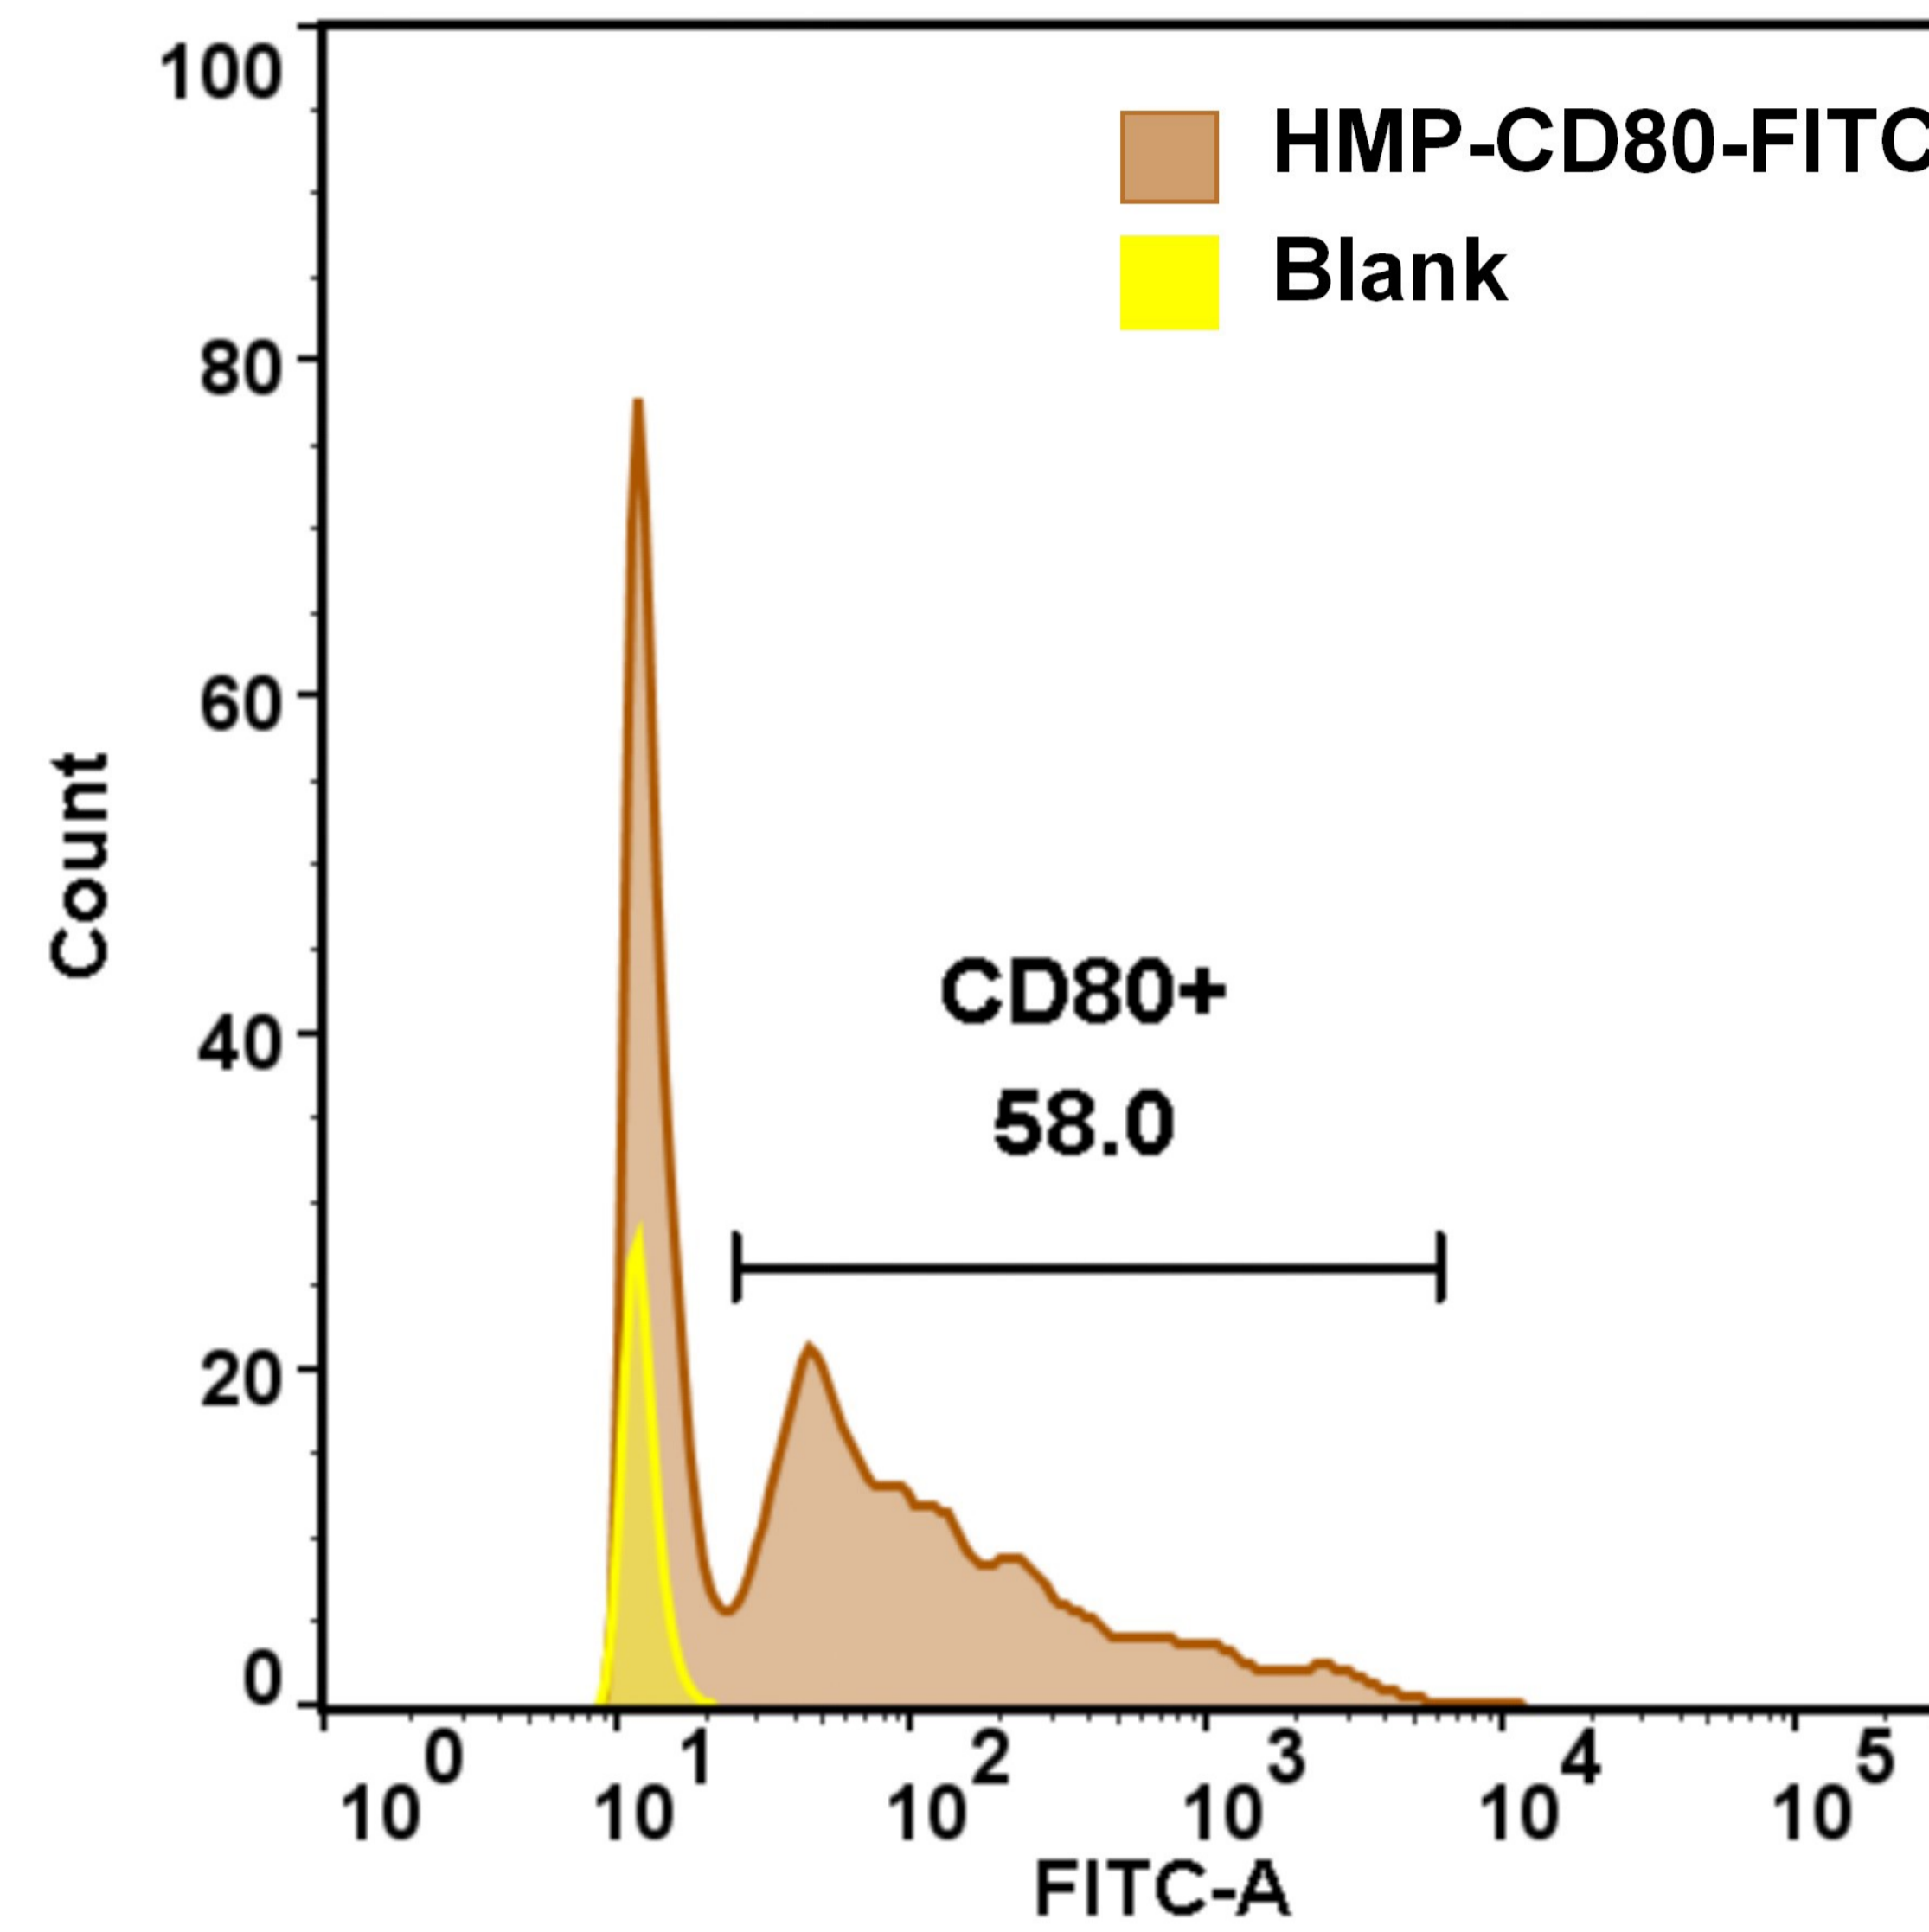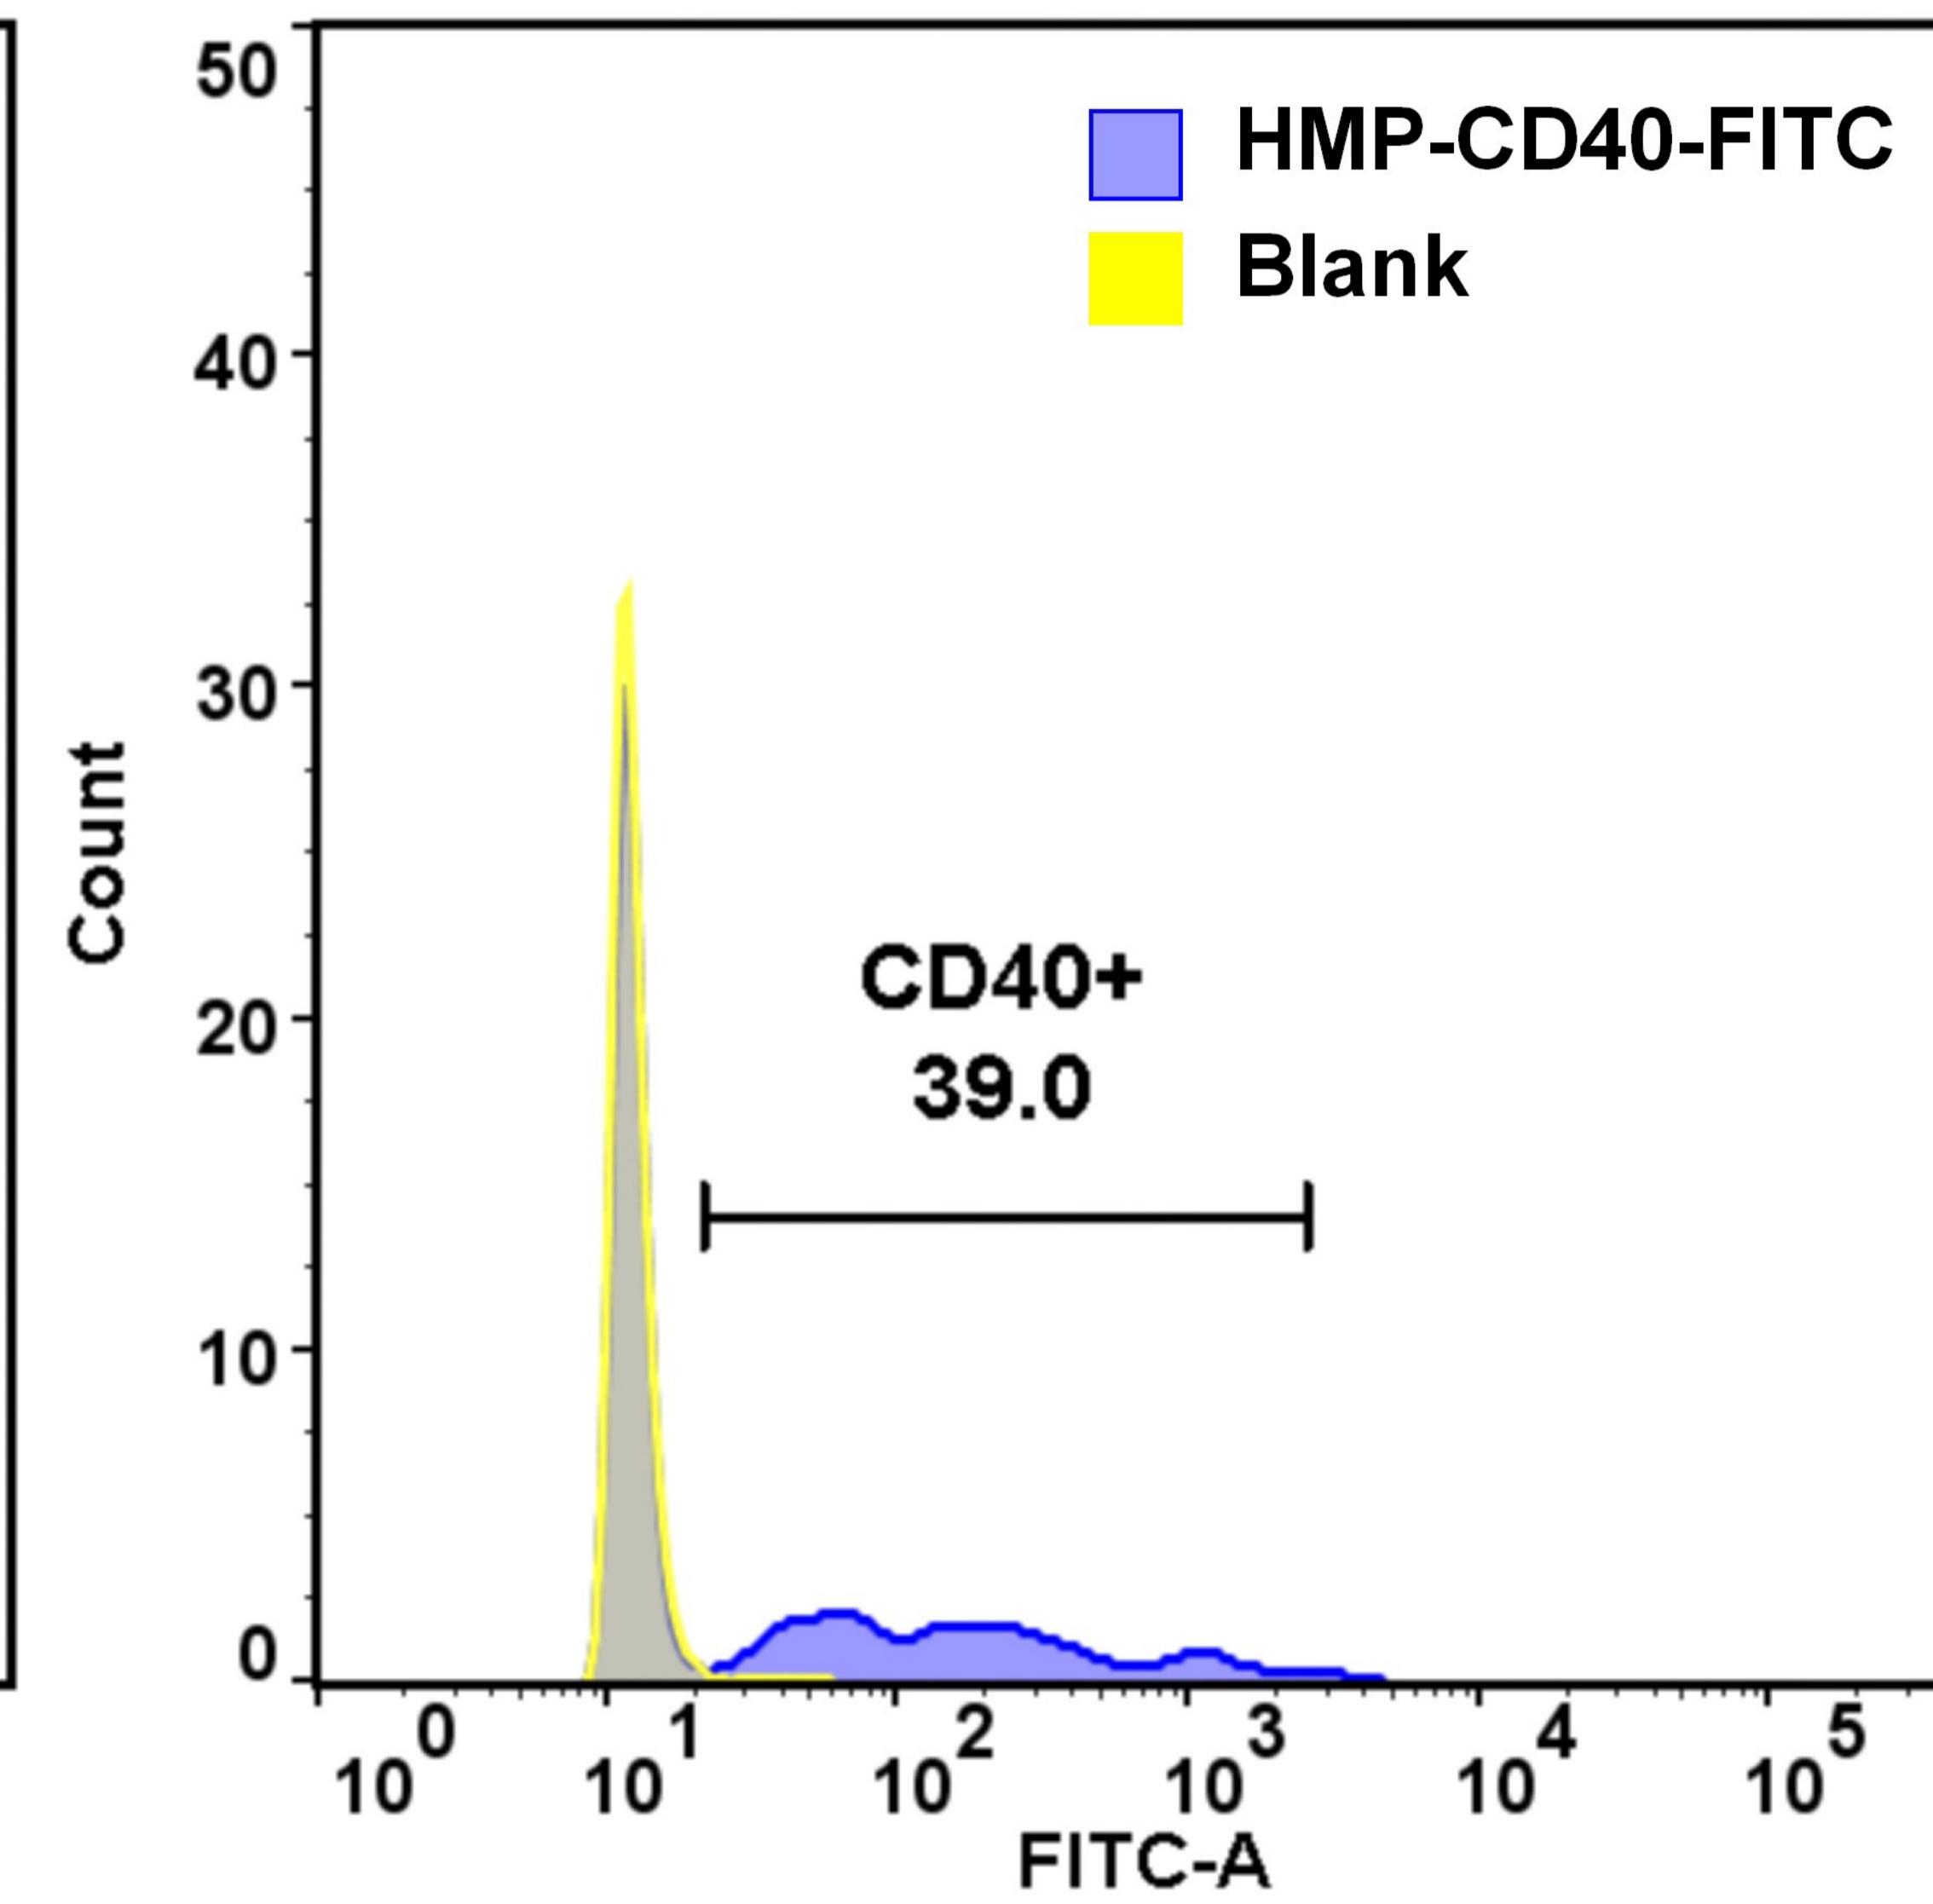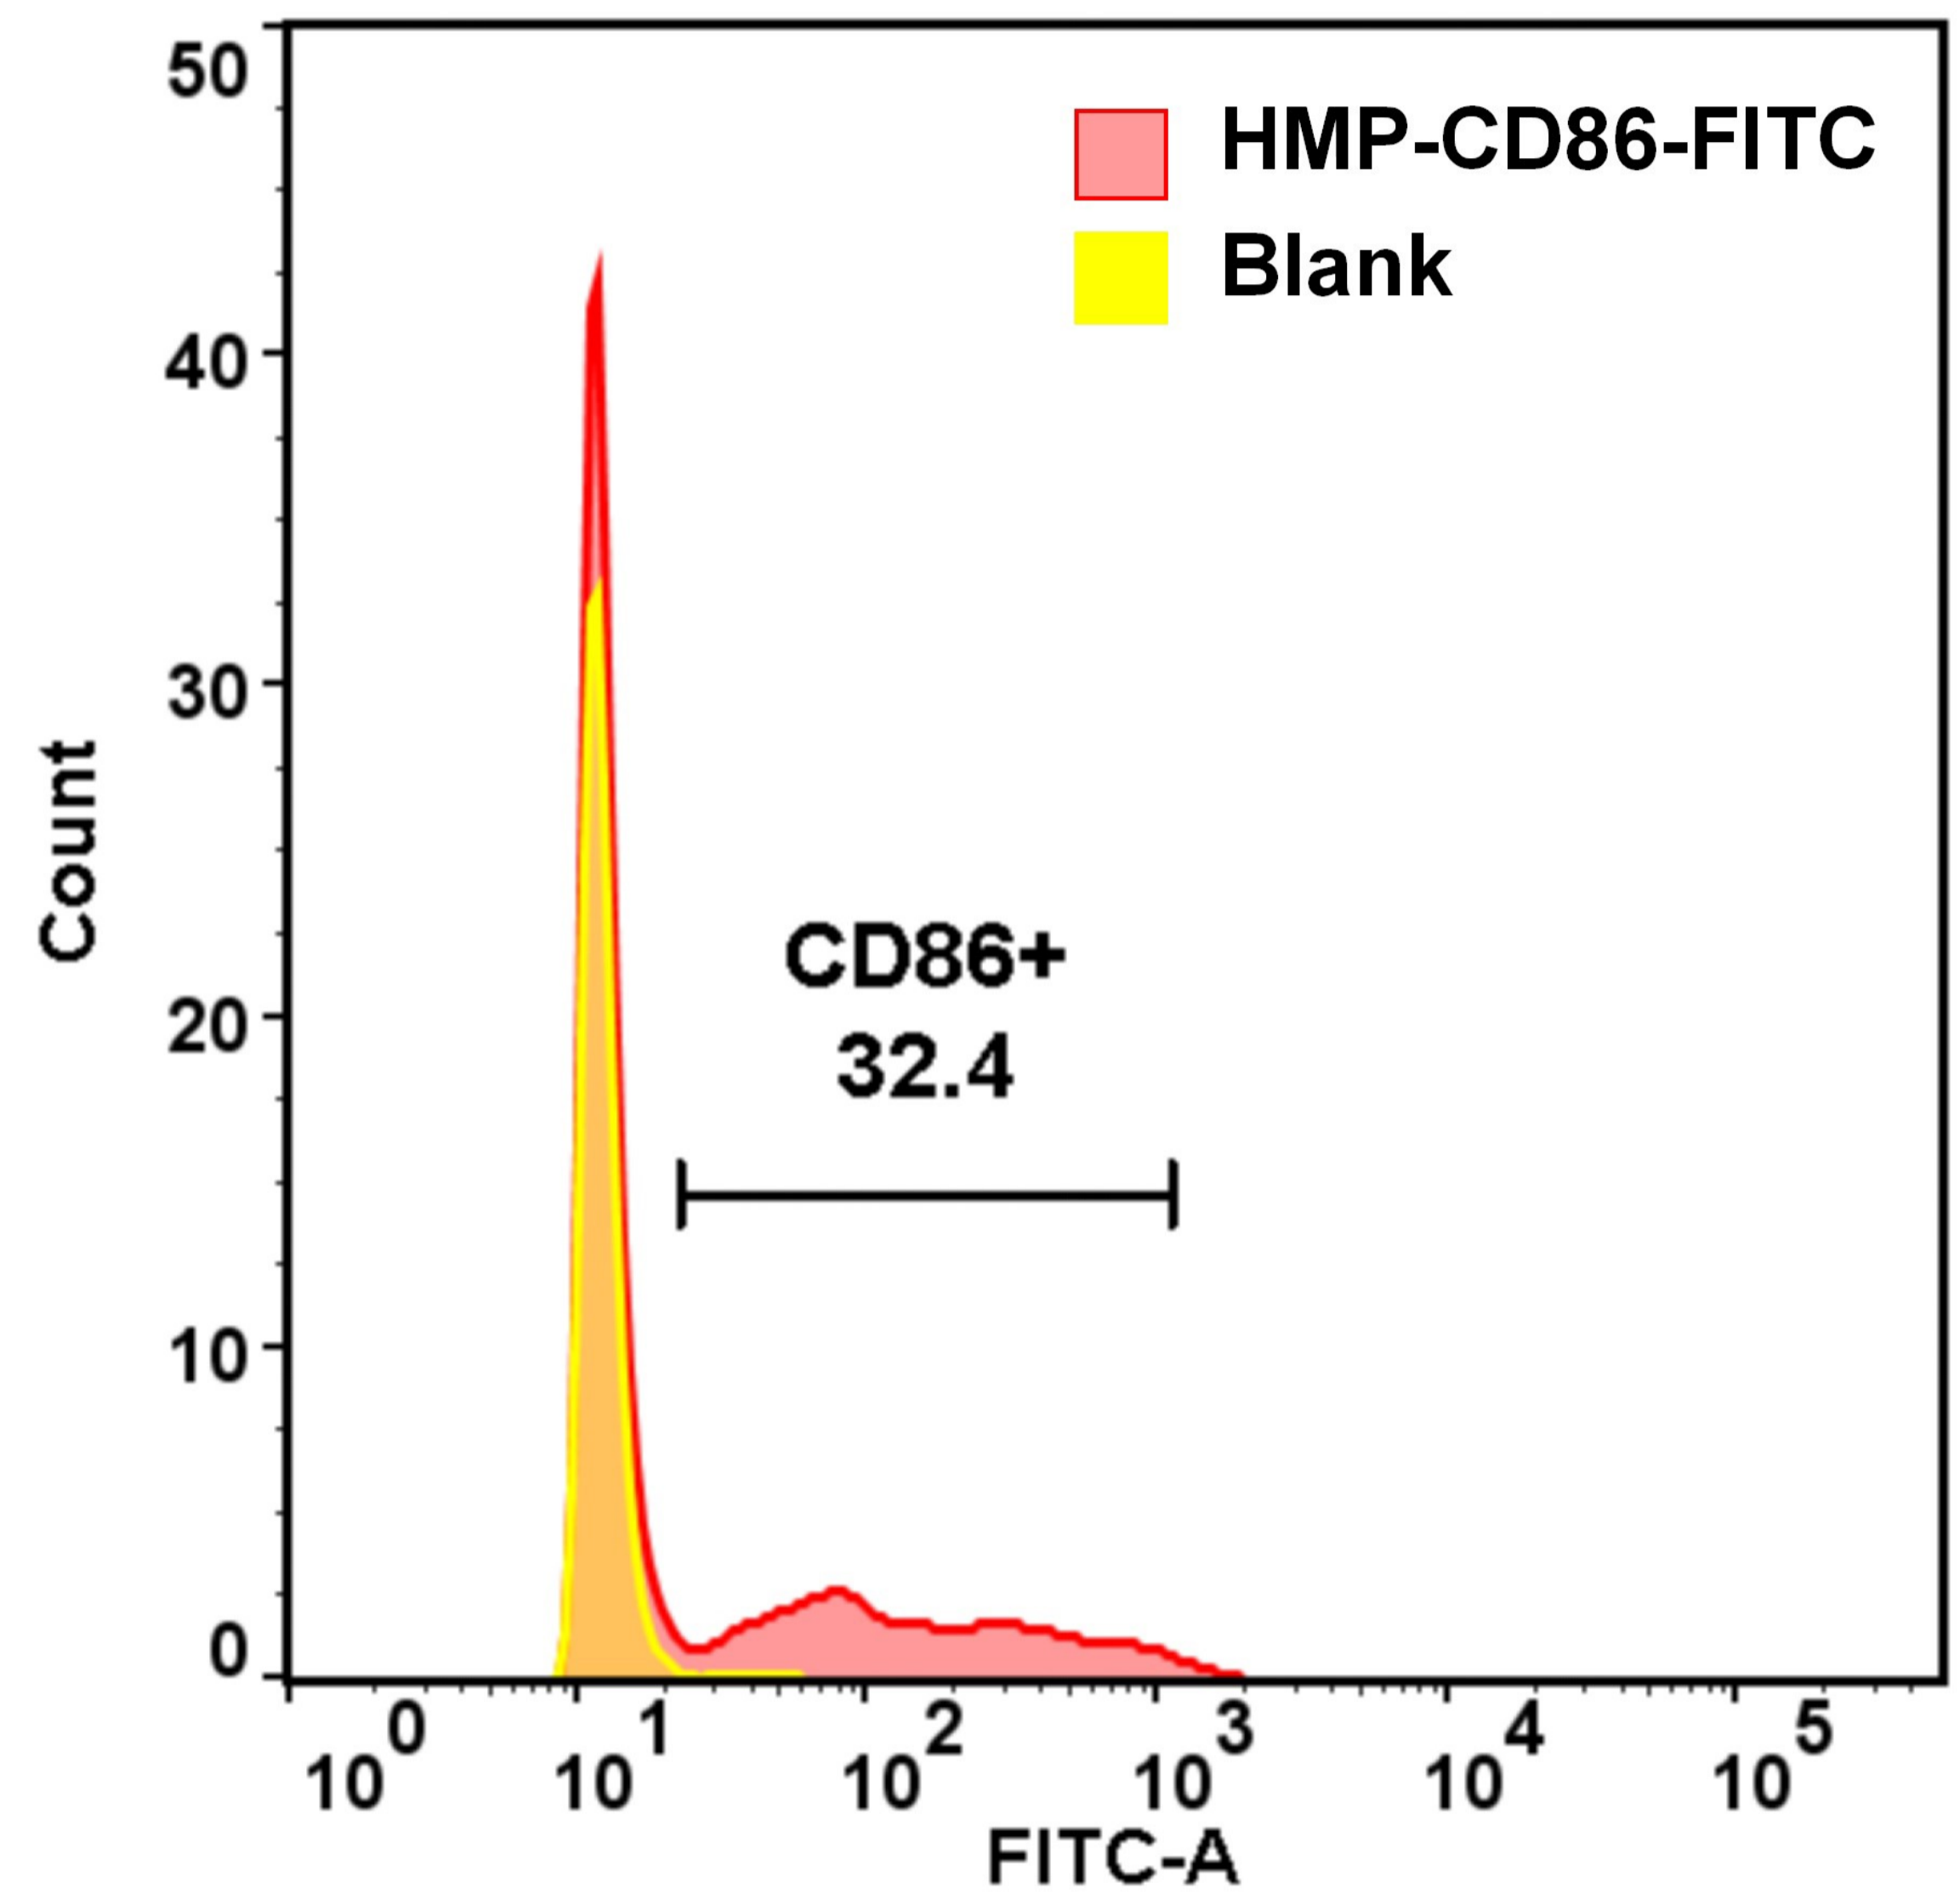

Supplement: d3bm01628e4.pdf [file d3bm01628e4.pdf]

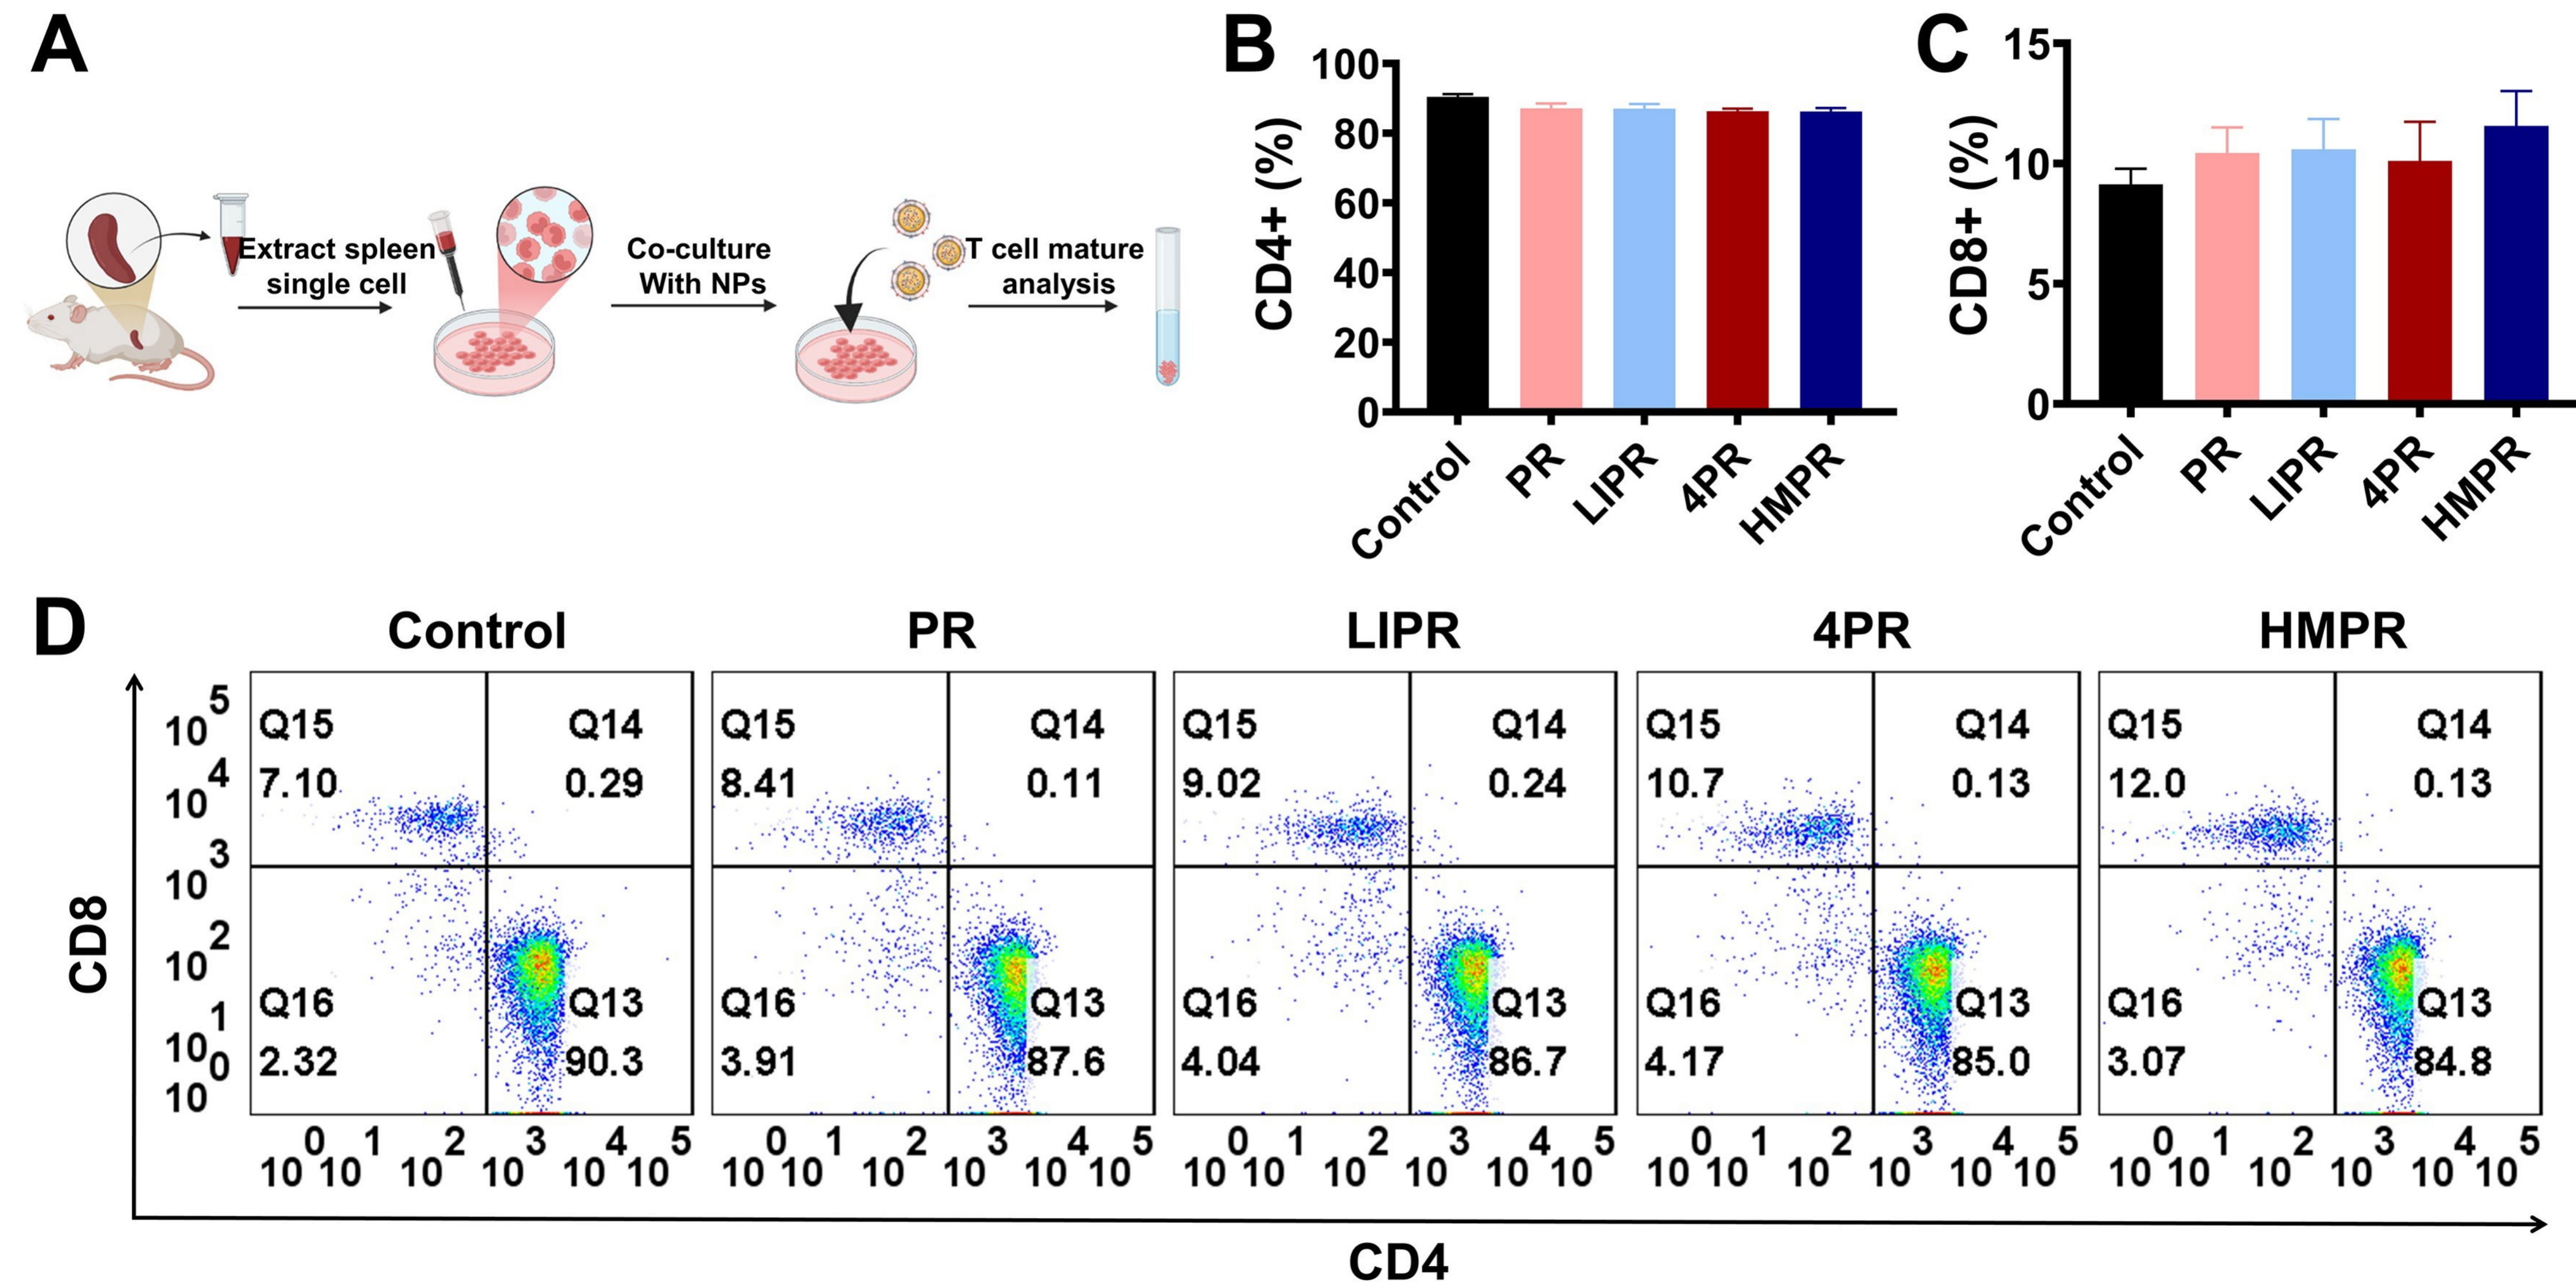

Supplement: d3bm01628e5.pdf [file d3bm01628e5.pdf]

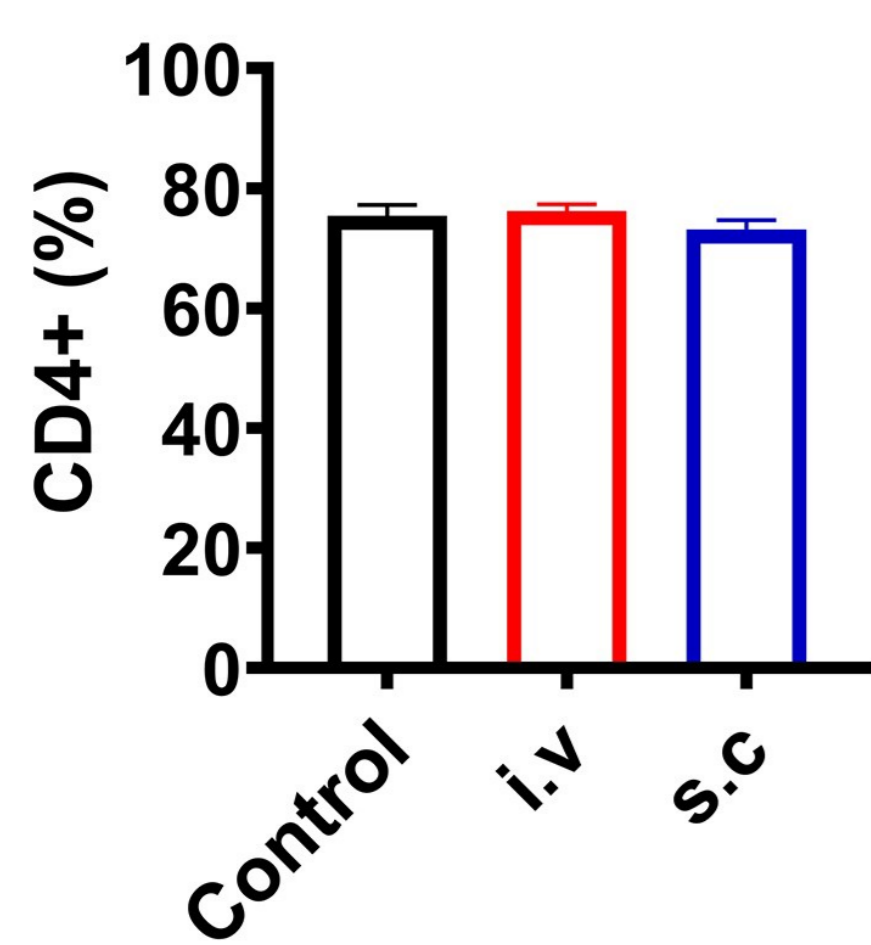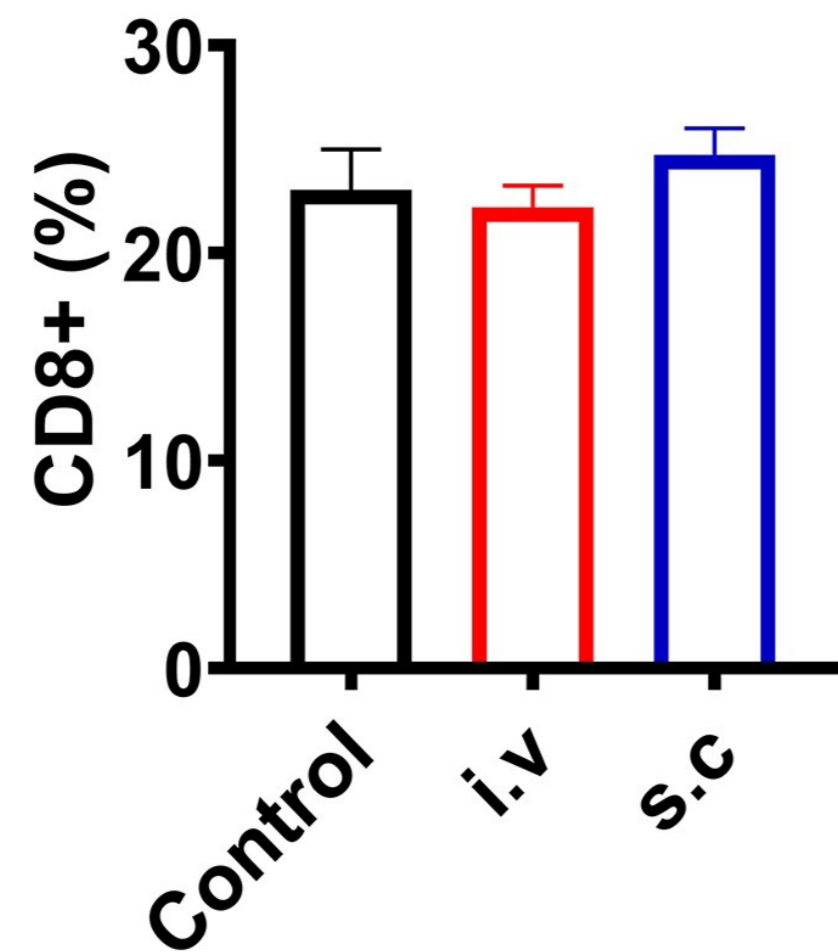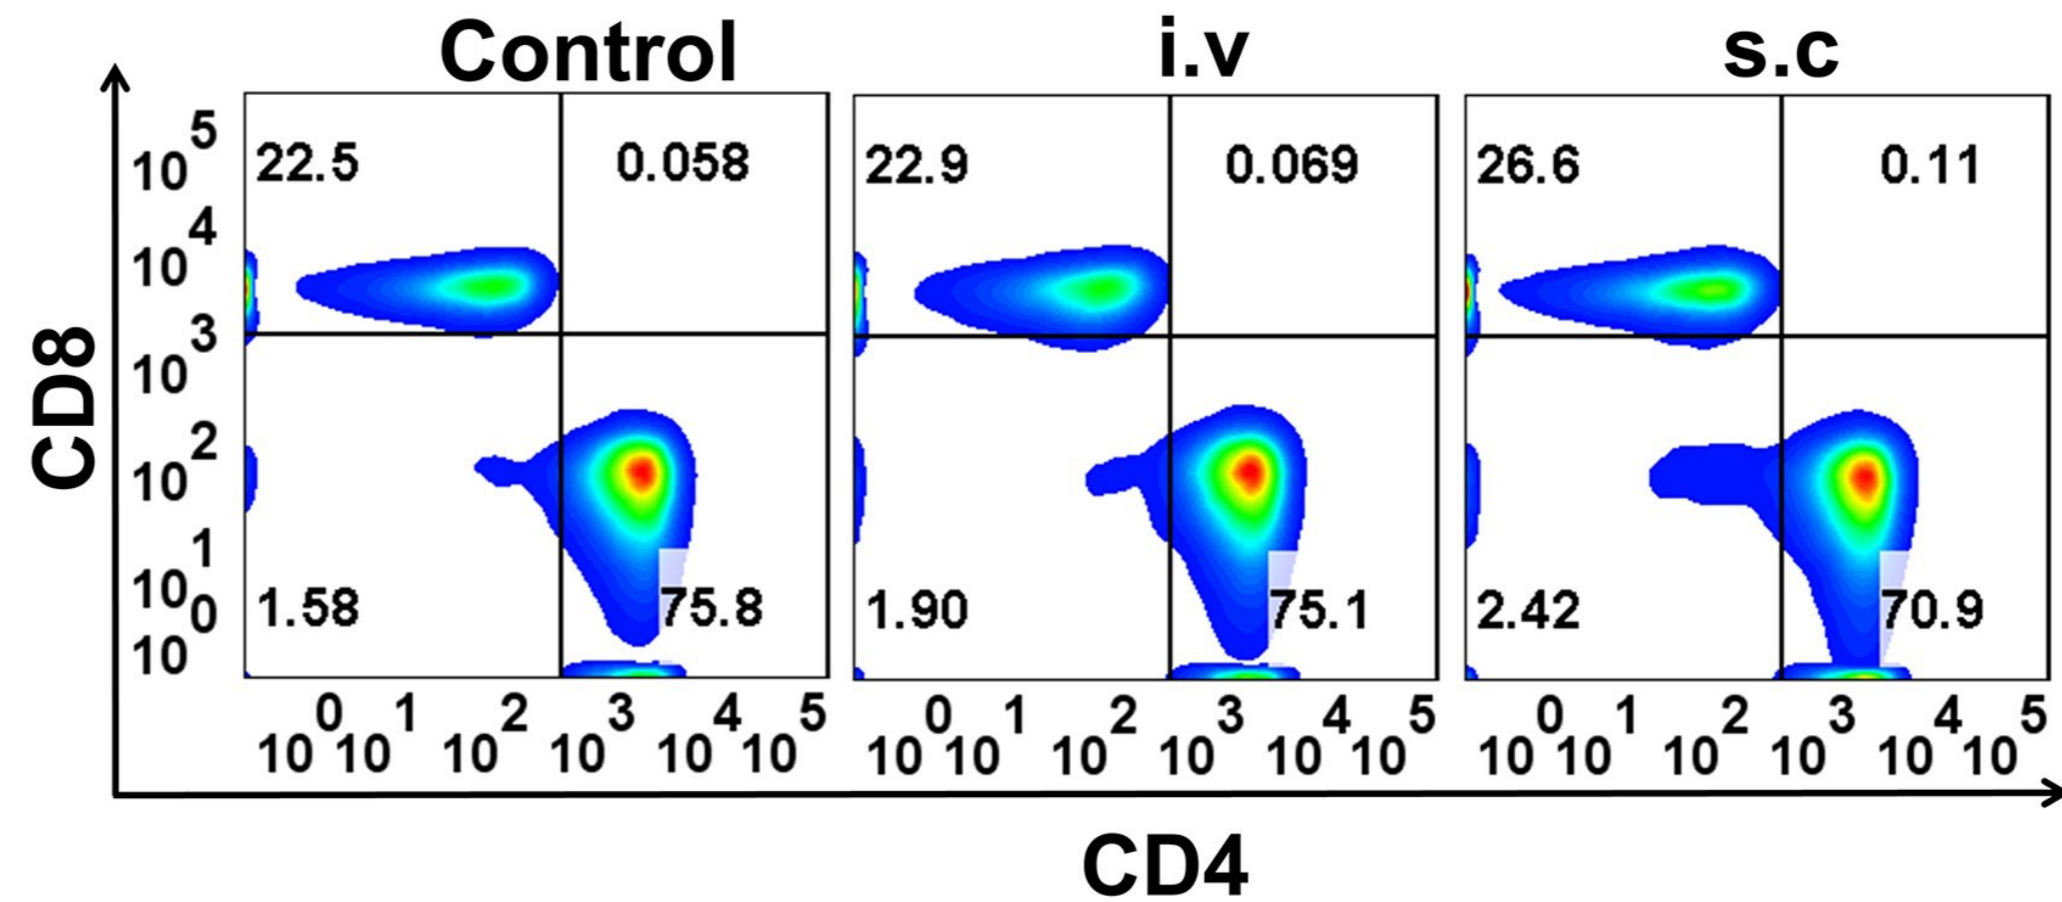

Supplement: d3bm01628e6.pdf [file d3bm01628e6.pdf]

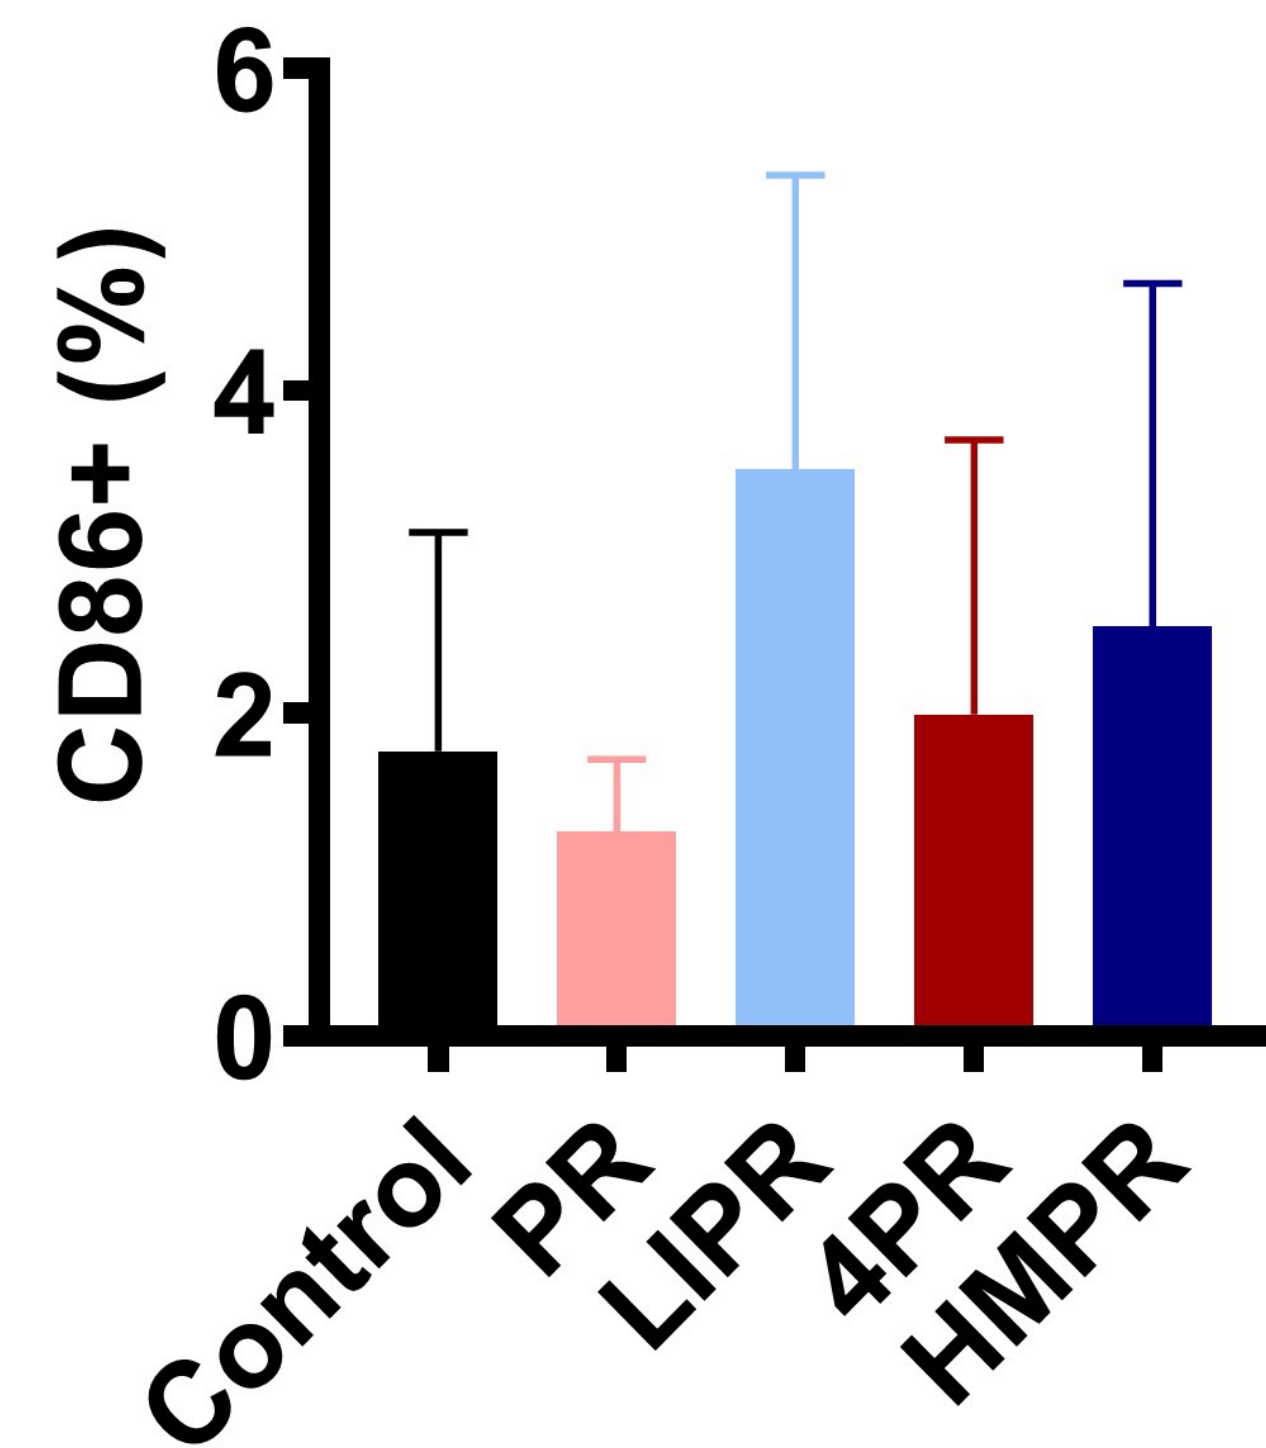

Supplement: d3bm01628e7.pdf [file d3bm01628e7.pdf]

## Lymph DC

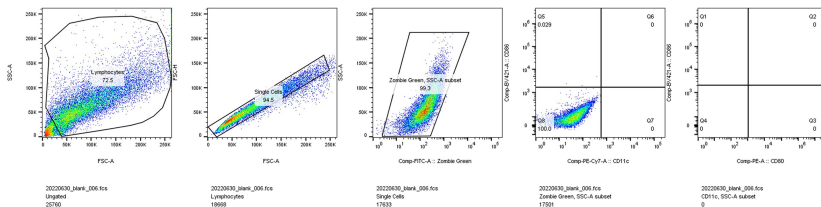

## BMDC

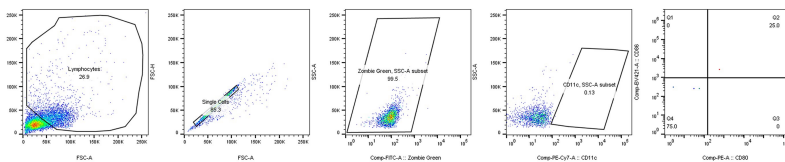

## TDLN DC

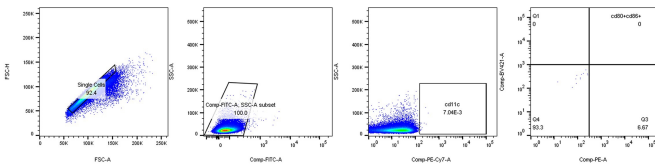

## Tumor T

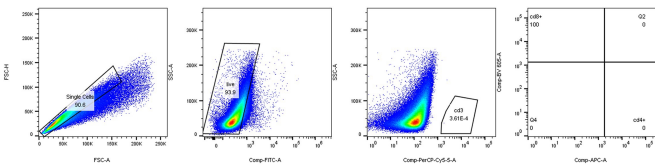

## Tumor MAC

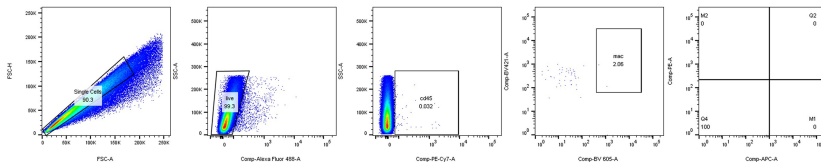

Supplement: d3bm01628e8.pdf [file d3bm01628e8.pdf]
